# Supplementary material for: To continue or not to continue? Antipsychotic medication maintenance versus dose-reduction/discontinuation in first episode psychosis: HAMLETT, a pragmatic multicenter single-blind randomized controlled trial
Source: Trials. 2020 Feb 7;21:147. doi: 10.1186/s13063-019-3822-5 (PMC7006112; doi:10.1186/s13063-019-3822-5)
Supplement: Supplementary file 1 — Additional file 1: Table S1. Tapering off schedules. [file 13063_2019_3822_MOESM1_ESM.xlsx]

## Sheet: Sheet1
Additional file 1: Table S1. Tapering off schedules
	Max dosis SPC	Tablets	Start	2w	4w	6 w	8w	10w	12w	14w	16w	18w	20w	22w	24w	26w	28w	30w
Risperidone	10	0,5, 1, 2, 3, 4,6	10	9	8	7	6	5	4	3	2	1,5	1	0,5	0,25	0.25	stop	stop
Olanzapine	20	2,5, 5, 10, 15, 20	20	17.5	17.5	15	12.5	10	7.5	5	5	2.5	2.5	1,25	1,25	stop	stop	stop
Quetiapine	800	25, 100, 200, 300	800	700	600	500	400	300	250	200	150	100	75	50	25	25	stop	stop
Aripiprazole	20	5,10, 15	20	15	15	12,5	12,5	10	10	7,5	7,5	5	5	2,5	2,5	stop	stop	stop
Haloperidol	20	1, 5	20	18	16	14	13	12	10	8	6	4	3	2	1	1	stop	stop
Zuclopenthixol	40	2, 10, 25	40	36	32	28	24	20	18	16	12	10	8	4	2	2	stop	stop
Sulpiride	800	400, 50	800	600	500	450	400	350	300	250	200	150	100	50	50	stop	stop	stop
Paliperidone	12	3,6,9*	12	10,5	10,5	9	7,5	7,5	6	6	4,5	3	3	1,5	1,5	stop	stop	stop
Pimozide	20	1, 4	20	18	16	14	12	10	8	7	6	4	3	2	1	1	stop	stop
Lurasidone	148	37, 74	148	111	111	92,5	92,5	74	74	55,5	55,5	37	37	18,5	18,5	stop	stop	stop
Clozapine	900	25, 100, 200	900	700	600	500	400	350	300	250	200	150	100	50	25	25	stop	stop
Amisulpride	800	100, 400	800	700	600	500	400	350	300	250	200	150	100	50	50	stop	stop	stop
Tiapride	600	100	600	500	450	400	350	300	250	200	150	100	100	50	50	stop	stop	stop
Sertindole	24	4, 16	24	22	20	18	16	14	12	10	8	6	4	2	2	stop	stop	stop
Chlor-protixene	300	15, 50	300	250	215	200	165	150	130	115	100	65	50	30	30	15	15	stop
			w = weeks
